# Supplementary material
Source: PubMed Central journal article supplement (PMC10059983)
Supplement: NIHMS1858709-supplement-1.pdf [file NIHMS1858709-supplement-1.pdf]

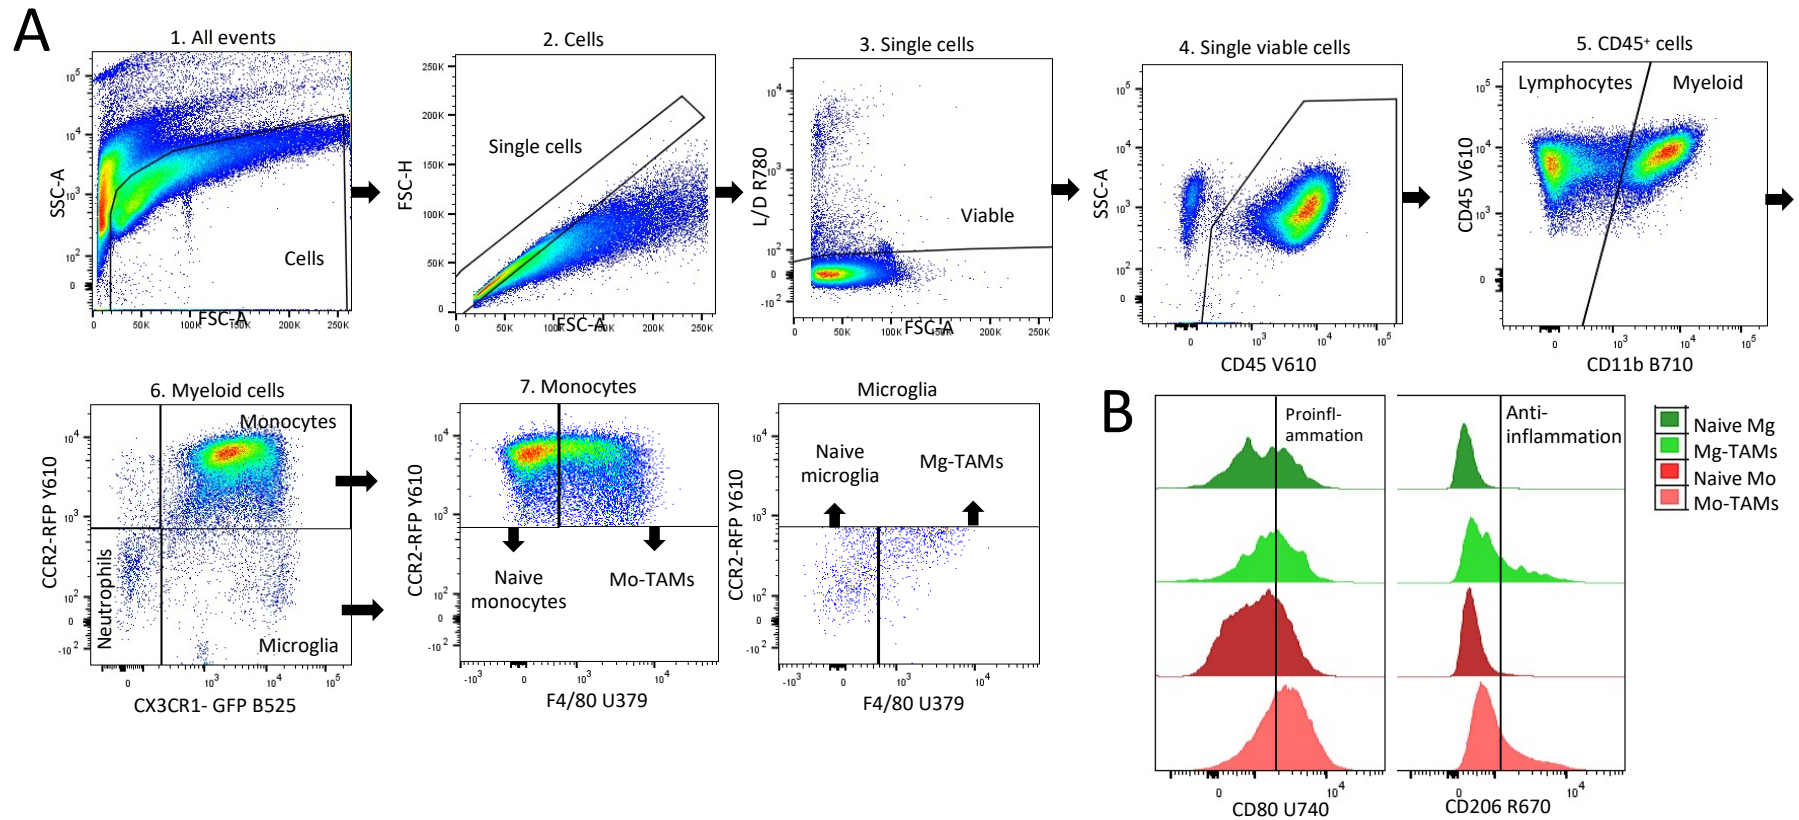

**Supplementary Figure.1 Gating strategy of flow cytometry analysis.** The plots were from the tumor tissue of an animal from Tumor\_No FUS group. A- gating strategy applied. B- discrimination of proinflammatory signature/anti-inflammatory signature.
